# Supplementary material
Source: Springer Nature journal article supplement (https://www.springermedizin.de/resource/supplementary/12916_2007_123_MOESM4_ESM.pdf/9599218)
Supplement: MOESM4 [file 9599218]

2a.

|                  | XPD-[Lys751Gln] |    |    |    |
|------------------|-----------------|----|----|----|
| IL10-[G(-1082)A] |                 | AA | AC | CC |
|                  | AA              |    |    |    |
|                  | AG              |    |    |    |
|                  | GG              |    |    |    |

2d.

|                  | XPD-[Lys751Gln] |    |    |    |
|------------------|-----------------|----|----|----|
| IL10-[G(-1082)A] |                 | AA | AC | CC |
|                  | AA              |    |    |    |
|                  | AG              |    |    |    |
|                  | GG              |    |    |    |

2b.

|                  | XPD-[Lys751Gln] |    |    |    |
|------------------|-----------------|----|----|----|
| IL10-[G(-1082)A] |                 | AA | AC | CC |
|                  | AA              |    |    |    |
|                  | AG              |    |    |    |
|                  | GG              |    |    |    |

2e.

|                   | COMT-[Met108/158Val] |    |    |    |
|-------------------|----------------------|----|----|----|
| CCND1-[Pro241Pro] |                      | AA | AC | CC |
|                   | AA                   |    |    |    |
|                   | AG                   |    |    |    |
|                   | GG                   |    |    |    |

2c.

|                  | XPD-[Lys751Gln] |    |    |    |
|------------------|-----------------|----|----|----|
| IL10-[G(-1082)A] |                 | AA | AC | CC |
|                  | AA              |    |    |    |
|                  | AG              |    |    |    |
|                  | GG              |    |    |    |

2f.

|                  | CYP17-[C(518)T] |    |    |    |
|------------------|-----------------|----|----|----|
| BARD1-[Pro24Ser] |                 | TT | CT | CC |
|                  | CC              |    |    |    |
|                  | CT              |    |    |    |
|                  | TT              |    |    |    |
